# Supplementary material for: Proton currents constrain structural models of voltage sensor activation
Source: eLife journal article supplement (doi:10.7554/elife.18017), 2016-08-30
Supplement: supp [file elife-18017-supp-v1.zip]

Fig. 1 Supplement 1

| S1  |                                              |             |
|-----|----------------------------------------------|-------------|
|     | 1.51 1.58                                    |             |
| 62  | RYYFIFTRLDLIWLSLNYFALLFLNFFEQP-----LWCE      | At TPC1 DI  |
| 430 | PNFGYAISFILIINFIADVVEETLTDIE-----            | At TPC1 DII |
| 30  | SFFTKFIIYLIVLNGITMGLTSTKTFM-----             | Ab Nav      |
| 12  | RIFQFTVVSIIILNAVLIG-ATTYELD-----             | Rh Nav      |
| 189 | KILAIISIMFIVLSTIALSLNTLPQL-----SLD           | Hs Kv2.1    |
| 163 | RIIAIVSVMVILISIVSFCLTLPPIFRDENEDMHGSGVTFHT   | Hs Kv1.2    |
| 227 | RVVAIISVVFVILLSTIVIFCLTLPPEFK----HYK----VFNT | Dm Shaker   |
|     | 241 247                                      |             |
| 116 | LGMRVFGVFLIFLDIILMIIDLSLPGK-----             | Ci VSP      |
| 147 | KPIHVAIIVLVVLDSFLVVGELLIDLK-----VII          | Ci Hv1      |
| 42  | HRFQVIIICLVVLDALLVLAELLLDLK-----IIE          | mHv1cc      |
| 95  | HRFQVIIICLVVLDALLVLAELLLDLK-----IIE          | Mm Hv1      |
| 99  | HRFQVIIICLVVLDALLVLAELLLDLK-----IIQ          | Hs Hv1      |
|     | 112 119                                      |             |
| S2  |                                              |             |
|     | 2.43 2.50 2.57                               |             |
| 95  | KNPKPSCKDRDYYYLGELPYLTNAESIIYEVIITLAILLVHTF  | At TPC1 DI  |
| 457 | -----ESSAQKPWQVAEFVFGWIYVLEMALKIYT--         | At TPC1 DII |
| 57  | -----QSFGVYTTLFNQIVITIFTIETIILRIY--          | Ab Nav      |
| 38  | -----PLFLETIHLLDYGITIFFVIEILIRFIG--          | Rh Nav      |
| 219 | EFG-----QSTDNPQLAHVEAVCIAWFTMEYLLRFLS--      | Hs Kv2.1    |
| 205 | YSN-STIGYQQSTSFTDPFFIVETLCIIWFSFEFLVRFFA--   | Hs Kv1.2    |
| 261 | TTNGTKIEEDEVPDITDPFFLIETLCIIWFTFELTVRFLA--   | Dm Shaker   |
|     | 283 287 293                                  |             |
| 143 | -----SESSQSFYDGMALALSCYFMLDLGLRIFA--         | Ci VSP      |
| 177 | VPH-----GNPAPEILHGFSLSILSIFMVIALKIIA--       | Ci Hv1      |
| 72  | PDE-----QDYAVTAFHYMSFAILVFFMLDLGLRIFA--      | mHv1cc      |
| 125 | PDE-----QDYAVTAFHYMSFAILVFFMLEIFFKIFV--      | Mm Hv1      |
| 129 | PDK-----NNYAAMVFHYMSITILVFFMMEIIFKLFV--      | Hs Hv1      |
|     | 150                                          |             |
| S3  |                                              |             |
|     | 3.50 3.61                                    |             |
| 137 | FPISYEGSRIFWTSRLNLVKVACVVILFVDVLVDFLYLS---   | At TPC1 DI  |
| 486 | ----YG-FENYWREGANRFDFLVTWVIVIGETATFITP----   | At TPC1 DII |
| 84  | ----VHRISFFKDPWSLFDFFVVA---ISLVPTS-----      | Ab Nav      |
| 66  | ----EKQKADFFKSGWNIFDTVIVA---ISLIPIPNN-----   | Rh Nav      |
| 251 | ----SPKKWKFFKGPLNAIDLLAILPYYVTIFLTESNK----   | Hs Kv2.1    |
| 244 | ----CPSKAGFFTNIIMNIDIVAIIPYFITLGTLEAEK----   | Hs Kv1.2    |
| 301 | ----CPNKLNFCRDVMNVIDIIAIIPYFITLATVVAEEEDTL   | Dm Shaker   |
|     | 316                                          |             |
| 172 | ----YGP-KNFFTNPWEVADGLIIVVTFVVTIFYTVLDEY--   | Ci VSP      |
| 209 | ----DH--RHFIHHKVEVLDAVVVVISFGVDIALIFVG----   | Ci Hv1      |
| 104 | ----YGP-KNFFTNPWEVADGLIVVVSFVLDLVLLFK-----   | mHv1cc      |
| 157 | ----FR--LEFFHHKFEILDADFVVVSFVLDLVLLFK-----   | Mm Hv1      |
| 161 | ----FR--LEFFHHKFEILDADFVVVSFILDIVLLFQ-----   | Hs Hv1      |
|     | 174 185                                      |             |
| S4  |                                              |             |
|     | 4.43 4.47 4.50 4.53 4.56                     |             |
| 176 | -----PLAFDFLP--FRIAPYRVVIIIFILSIRELRDTLV     | At TPC1 DI  |
| 519 | -----DENTFFSNGEWIRYLLLARMLRLILLMNVRQYRA      | At TPC1 DII |
| 111 | -----SGFEILRVLRVLRRLFRIVTAVPQ                | Ab Nav      |
| 96  | -----SSFLVRLRLRIFRVLRRLISVIPE                | Rh Nav      |
| 285 | -----SVLQFQ-----NVRRVQIFRIMRILILKLARH        | Hs Kv2.1    |
| 278 | -----PEDAQQ--GQQAMSLAILRVIRLVRFVIFKLSRH      | Hs Kv1.2    |
| 339 | NLPKAPVSPQDKSSNQAMSLAILRVIRLVRFVIFKLSRH      | Dm Shaker   |
|     | 362 371                                      |             |
| 207 | ----VQETGADGL--GRLVVLARLLRVVRLARIFYSHQQ      | Ci VSP      |
| 241 | -----ESEALAAI----GLLVILRLWRVFRINGIIVTVK      | Ci Hv1      |
| 136 | -----SHHFEAL----GLLILLRLWRVARIINGIISRM       | mHv1cc      |
| 188 | -----SHHFEAL----GLLILLRLWRVARIINGIISVK       | Mm Hv1      |
| 192 | -----EHQFEAL----GLLILLRLWRVARIINGIISVK       | Hs Hv1      |
|     | 205 214                                      |             |
